# Supplementary material
Source: Springer Nature journal article supplement (https://www.springermedizin.de/resource/supplementary/13049_2011_473_MOESM1_ESM.pdf/9666520)
Supplement: MOESM1 [file 9666520]

# Minimal, mild and moderate head injuries

No additional risk factor (table 3) present \*

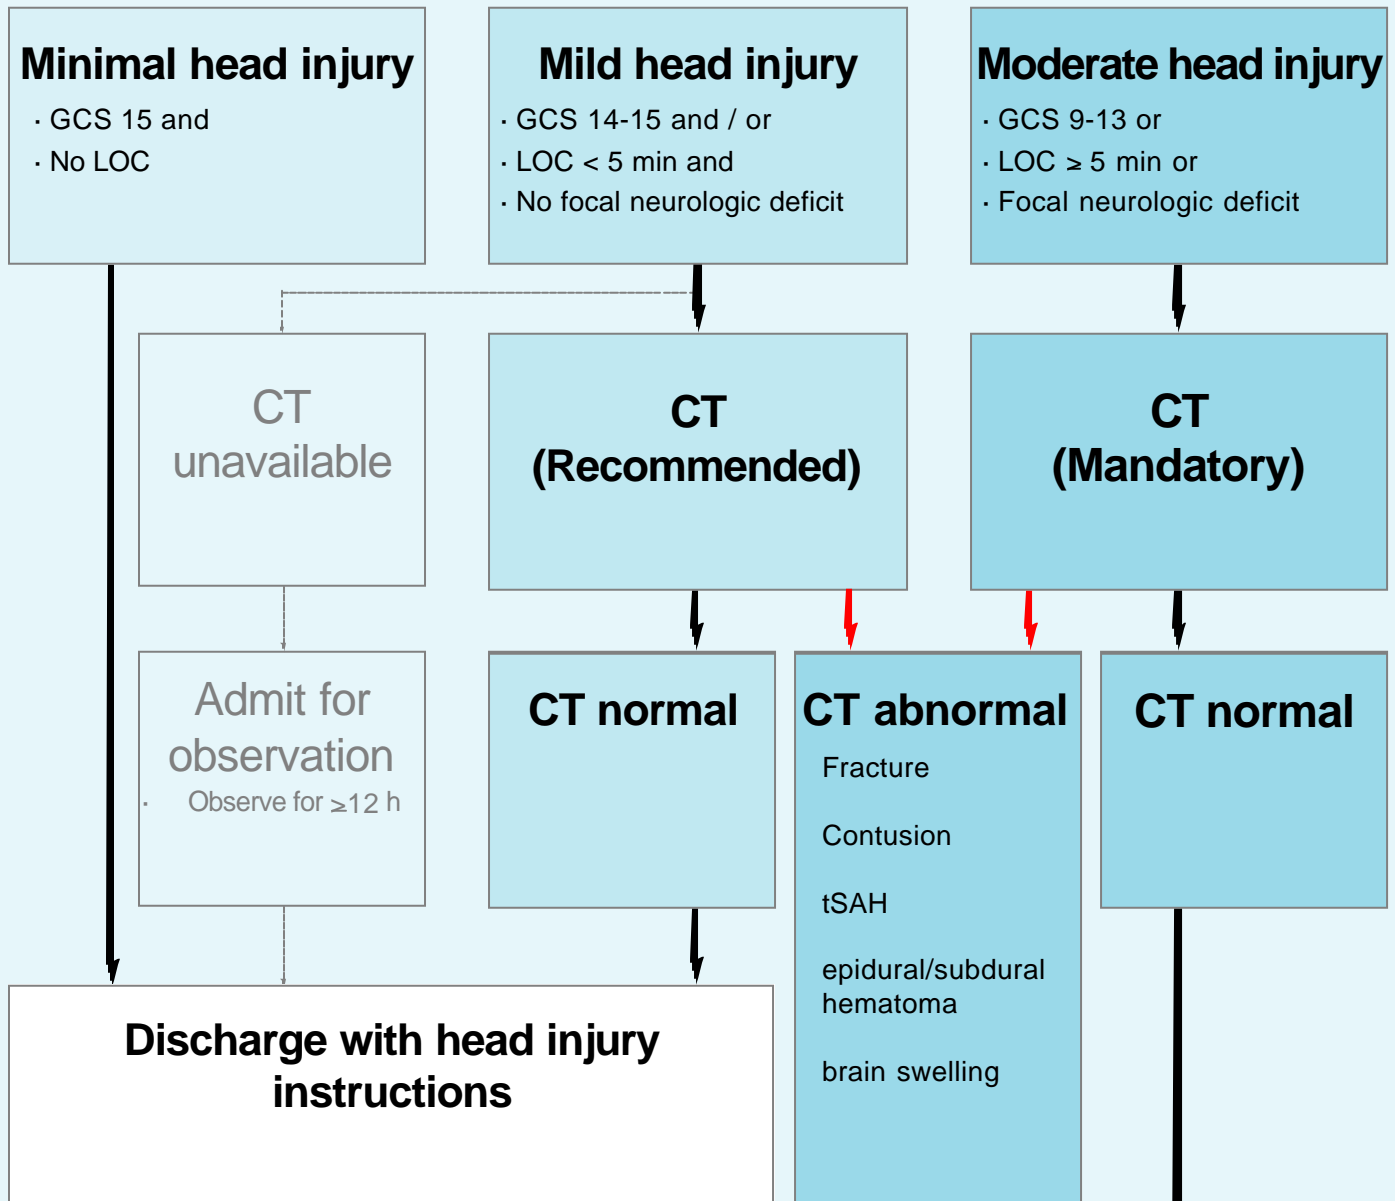

**\*Additional risk factors**  
(CT and admittance for observation mandatory)

Therapeutic anticoagulation (e.g. use of warfarin) or hemophilia

Radiographically demonstrated skull fracture

Clinical signs of depressed skull fracture or skull base fracture

Posttraumatic seizures

Shunt-treated hydrocephalus

Multiple injuries

**Admit for observation**

Consult neurotrauma center

Observe for ≥12 h

**Admit for observation**

Observe for ≥12 h

Consider consultation with neurotrauma center and new CT
